# Supplementary material for: Understanding the breathing phenomena in nano-ZIF-7 upon gas adsorption
Source: Royal Society of Chemistry journal article supplement (doi:10.1039/c7ta05922a), 2017-01-01
Supplement: c7ta05922a1.pdf [file c7ta05922a1.pdf]

## Understanding the breathing phenomena in nano-ZIF-7 upon gas adsorption

Carlos Cuadrado-Collados,<sup>1</sup> Javier Fernández-Català,<sup>1</sup> François Fauth,<sup>2</sup> Yongqiang Q. Cheng,<sup>3</sup>  
Luke L. Daemen,<sup>3</sup> Anibal J. Ramirez-Cuesta,<sup>3</sup> Joaquín Silvestre-Albero<sup>1,\*</sup>

<sup>1</sup> Laboratorio de Materiales Avanzados, Departamento de Química Inorgánica-Instituto Universitario de Materiales, Universidad de Alicante, Ctra. San Vicente-Alicante s/n, E-03690 San Vicente del Raspeig, Spain

<sup>2</sup> CELLS-ALBA Synchrotron, E-08290 Cerdanyola del Vallés, Barcelona, Spain

<sup>3</sup> Oak Ridge National Laboratory, Chemical and Engineering Materials Division, 1 Bethel Valley Road, Oak Ridge, Tennessee 37831, USA

SUPPORTING INFORMATION

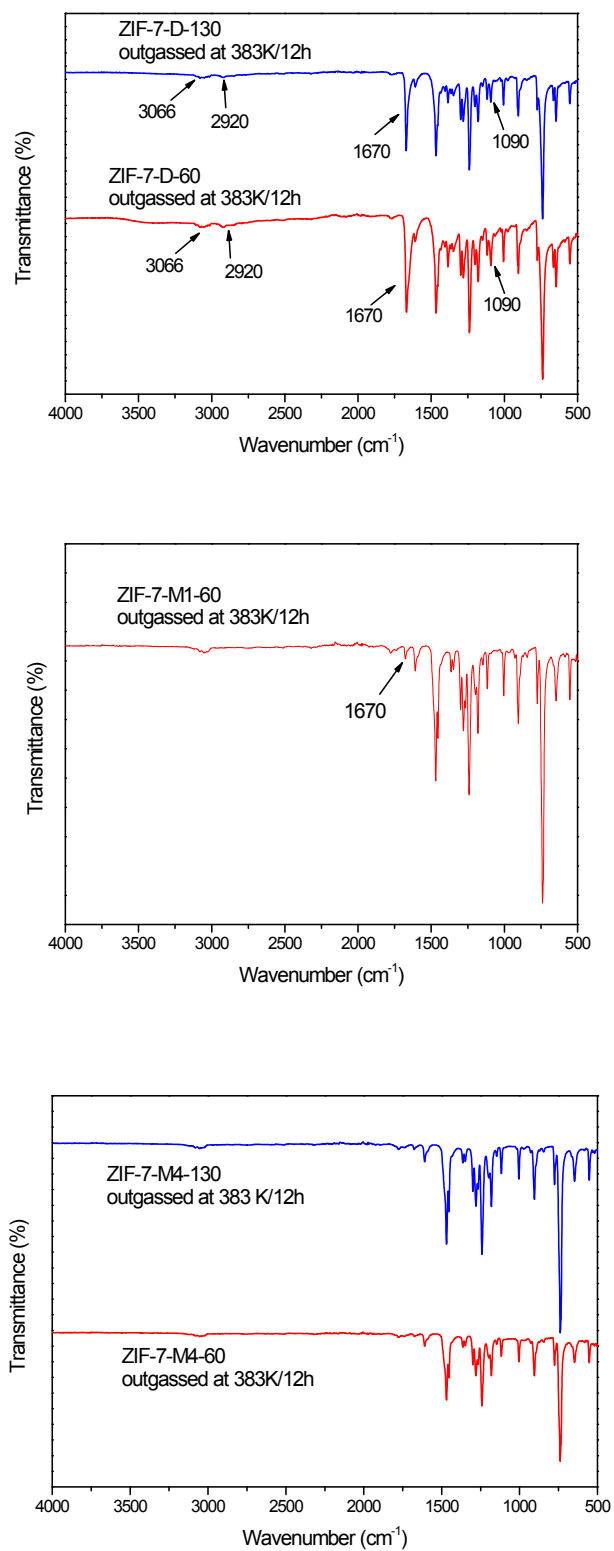

**Figure S1.** FTIR spectra for the different ZIF-7 samples after an outgassing treatment at 383K for 12h.

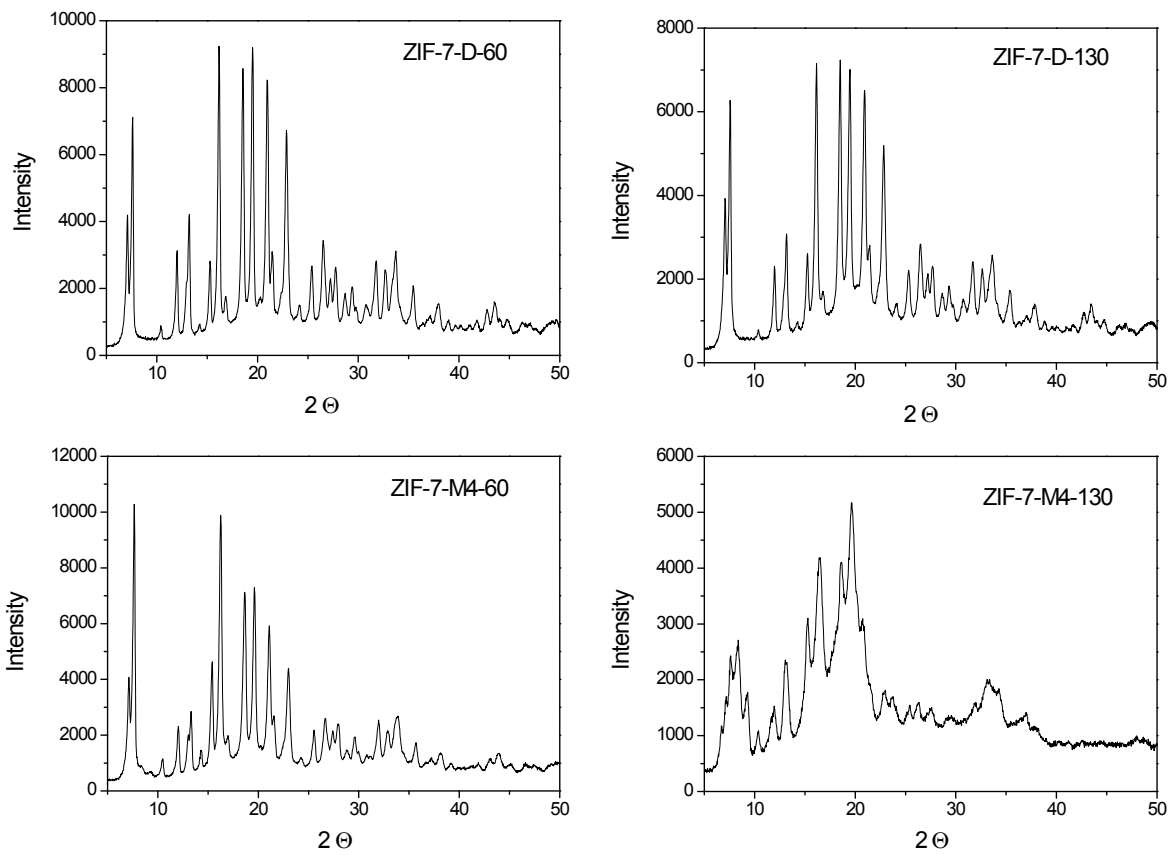

**Figure S2.** XRD pattern for the different ZIF-7 samples prepared.

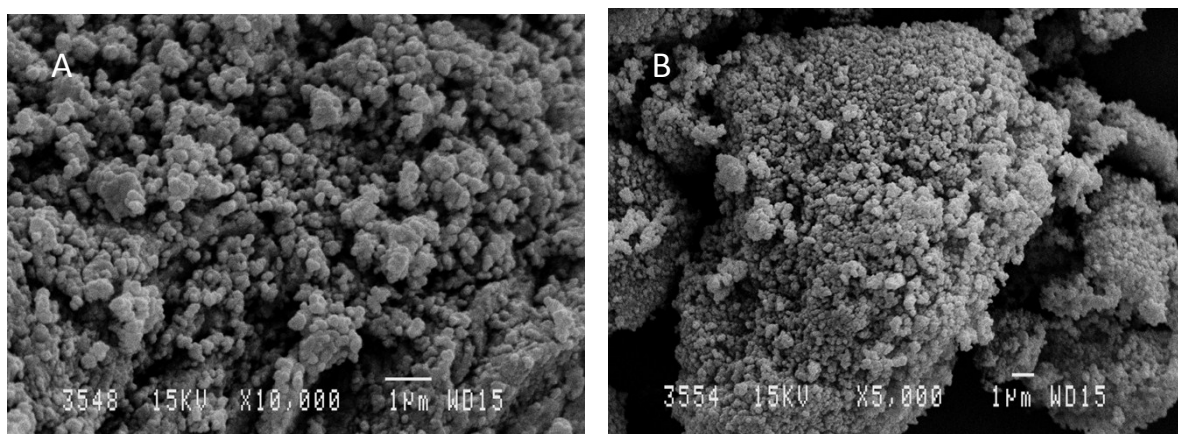

**Figure S3.** SEM images of two representative samples (a) ZIF-7-D-130 and (b) ZIF-7-M4-60.

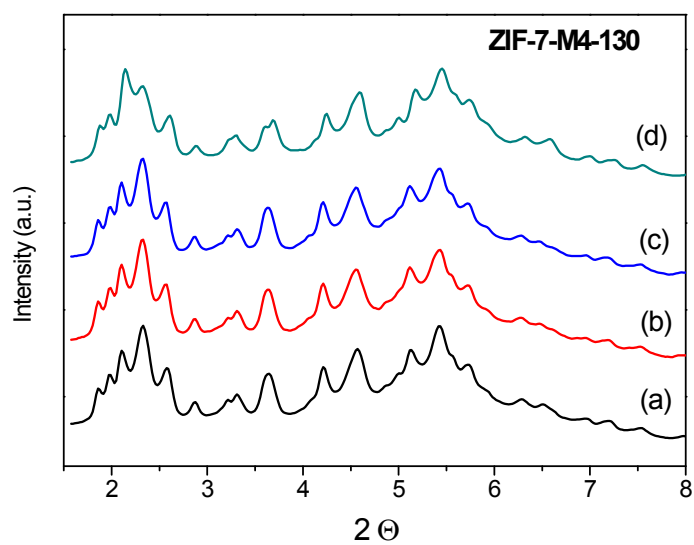

**Figure S4.** XRD pattern for ZIF-7-M4-130 after (a) vacuum at 298 K, heating under vacuum at 358 K for (b) 1 min and (c) 60 min, and (d) after vacuum at 80 K.

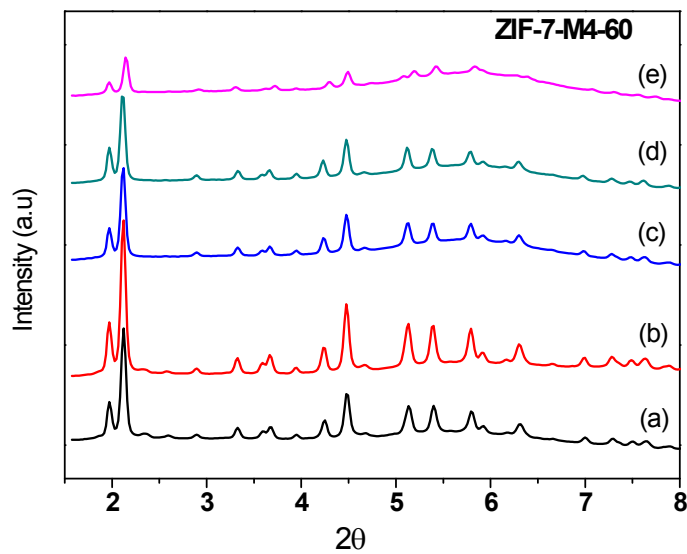

**Figure S5.** SXR D pattern for ZIF-7-M4-60 under (a) atmospheric pressure at 298 K, (b) vacuum at 298 K, (c) heat treatment under vacuum at 358 K, (d) heat treatment under vacuum at 458 K and (e) 80 K under vacuum.

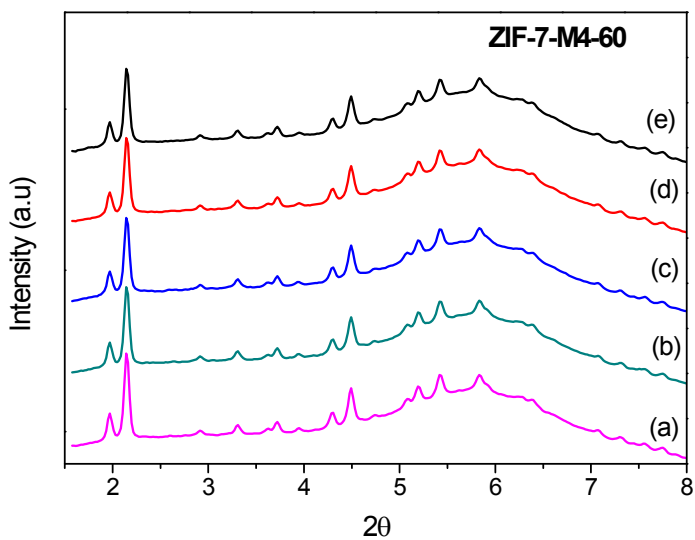

**Figure S6.** SXR D pattern for ZIF-7-M4-60 under (a) vacuum at 80 K, and after incorporation of  $N_2$  at (b) 0.1 bar, (c) 0.2 bar, (d) 0.4 bar and (e) 1.0 bar.

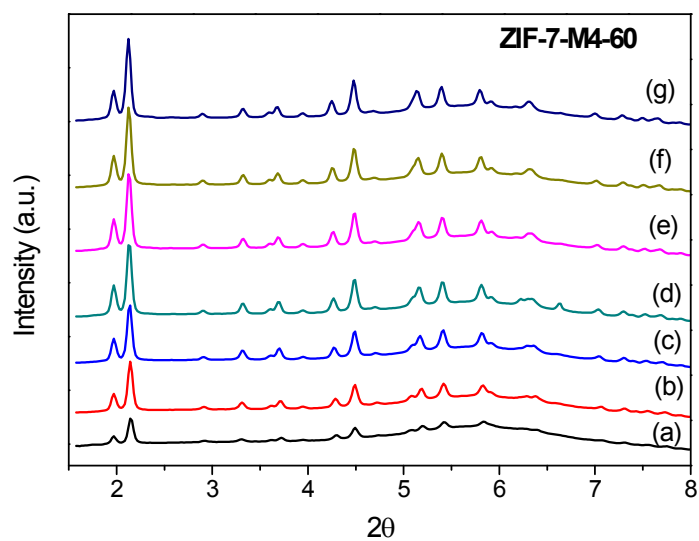

**Figure S7.** XRD pattern for ZIF-7-M4-60 under 1.0 bar of N<sub>2</sub> at (a) 90 K, (b) 130 K, (c) 170 K, (d) 210 K, (e) 250 K, (f) 273 K and (g) 298 K.

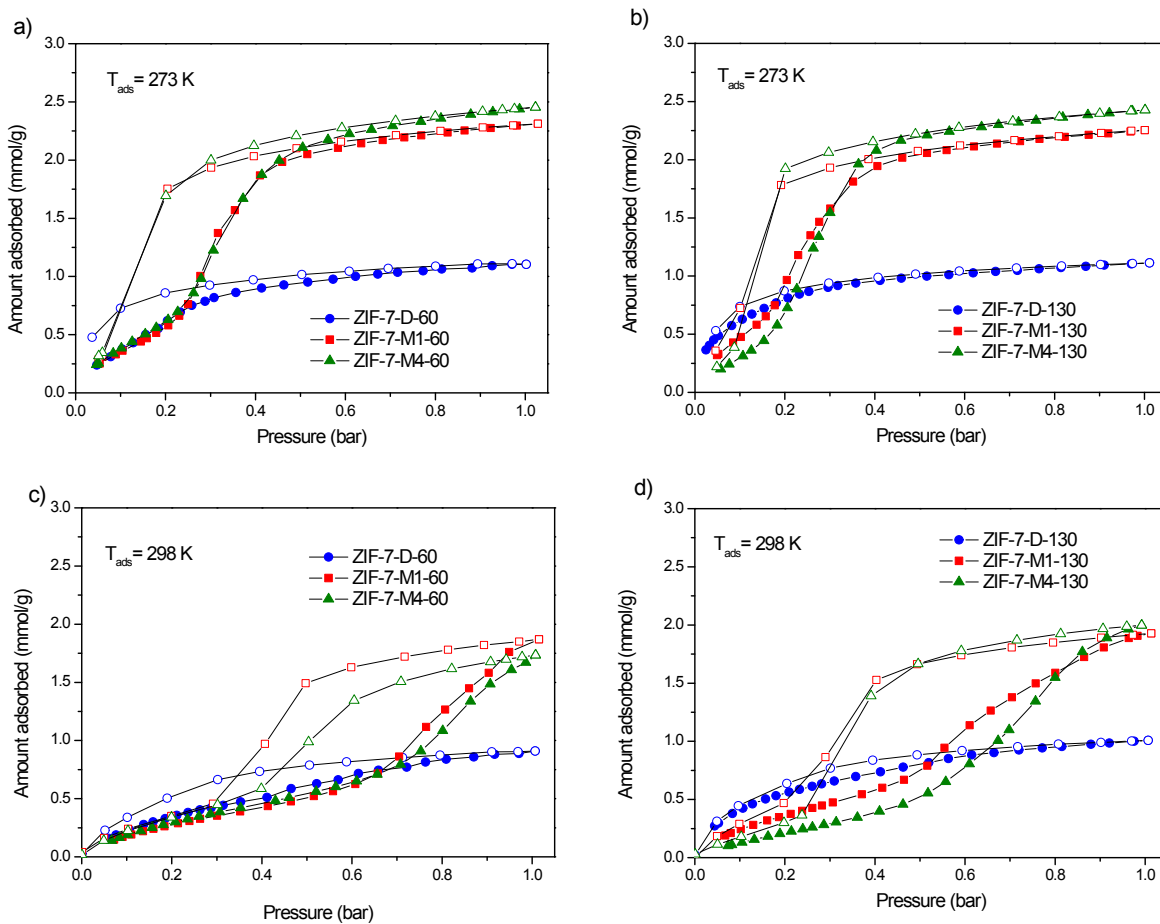

**Figure S8.** CO<sub>2</sub> adsorption/desorption isotherms versus total pressure at 273K and 298K for all ZIF-7 samples evaluated.

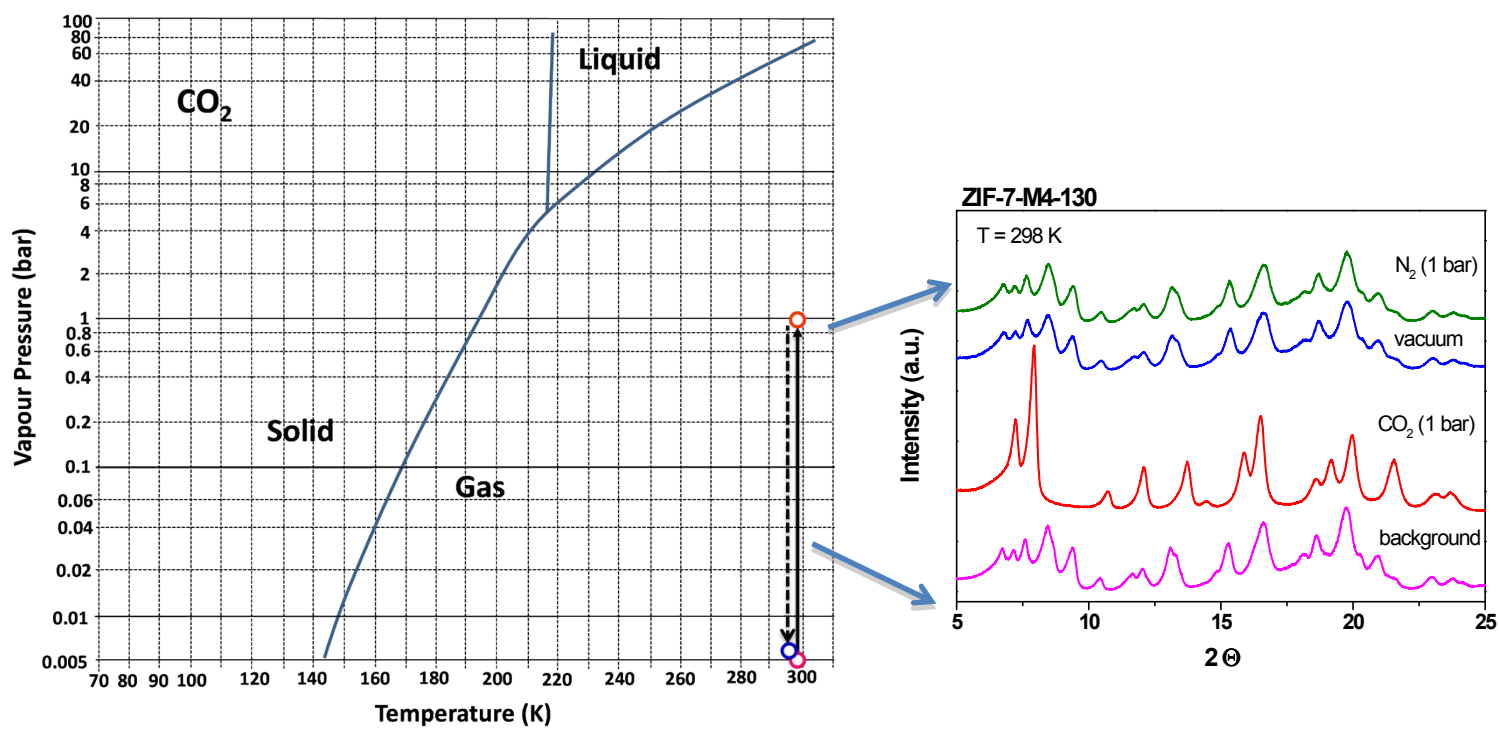

**Figure S9. A.** Conventional XRD pattern for ZIF-7-M4-130 at 298K as-synthesized (background), after exposure to 1 bar of CO<sub>2</sub>, after a vacuum treatment at 298 K for 30 min and after exposure to 1 bar N<sub>2</sub> at the same temperature.
